# Supplementary material for: Multidimensional encoding of restricted and anisotropic diffusion by double rotation of the q vector
Source: Magn Reson (Gott). 2023 Mar 15;4(1):73–85. doi: 10.5194/mr-4-73-2023 (PMC10583292; doi:10.5194/mr-4-73-2023)
Supplement: The supplement related to this article is available online at: https://doi.org/10.5194/mr-4-73-2023-supplement. [file mr-4-73-supplement.zip › mr-4-73-2023-supplement-title-page.pdf]

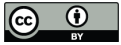

*Supplement of*

## **Multidimensional encoding of restricted and anisotropic diffusion by double rotation of the $q$ vector**

**Hong Jiang et al.**

*Correspondence to:* Daniel Topgaard ([daniel.topgaard@fkem1.lu.se](mailto:daniel.topgaard@fkem1.lu.se))

- [mr-4-73-2023-supplement-title-page.pdf](#)
- [supplement\\_fig2code.m](#)

The copyright of individual parts of the supplement might differ from the article licence.
